# Supplementary material
Source: PubMed Central journal article supplement (PMC6548643)
Supplement: NIHMS1025324-supplement-Supplementary_Fig_S1.pdf [file NIHMS1025324-supplement-Supplementary_Fig_S1.pdf]

## Overview of the identified mutations in UNC7 HNSCC cell line

| Gene    | Chromosome | Variant           | Mutation     |
|---------|------------|-------------------|--------------|
| TP53    | 17         | c.1118delA        | p.K373Rfs*49 |
| TP53    | 17         | c.527G>A          | p.C176Y      |
| APC     | 5          | c.5987A>T         | p.Q1996L     |
| BRCA1   | 17         | c.2596C>T         | p.R866C      |
| BRCA2   | 13         | c.1460C>A         | p.A487E      |
| CDKN2A  | 9          | c.251A>G          | p.D84G       |
| CREBBP  | 16         | c.7306G>A         | p.E2436K     |
| FGFR3   | 4          | c.973C>A          | p.L325M      |
| NOTCH1  | 9          | c.4820dupA        | p.R1608Afs*2 |
| NOTCH2  | 1          | c.1070_1072delTCT | p.F357del    |
| PIK3C2A | 11         | c.3280C>T         | p.P1094S     |
