# Supplementary material
Source: PubMed Central journal article supplement (PMC6548643)

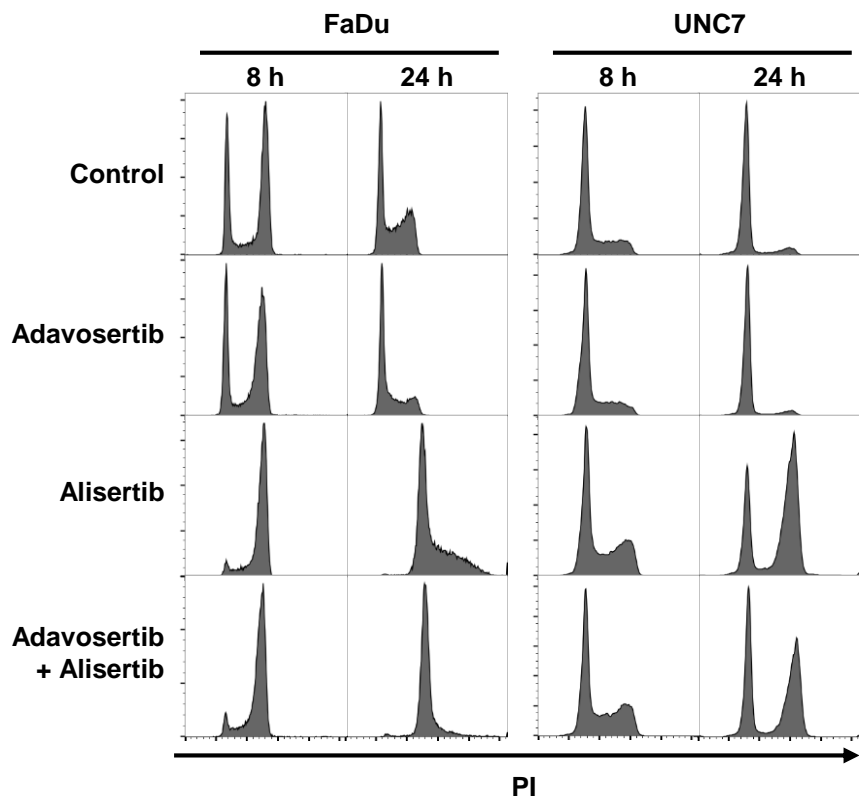

Supplement: NIHMS1025324-supplement-Supplementary_Fig_S2.pdf [file NIHMS1025324-supplement-Supplementary_Fig_S2.pdf]

**A**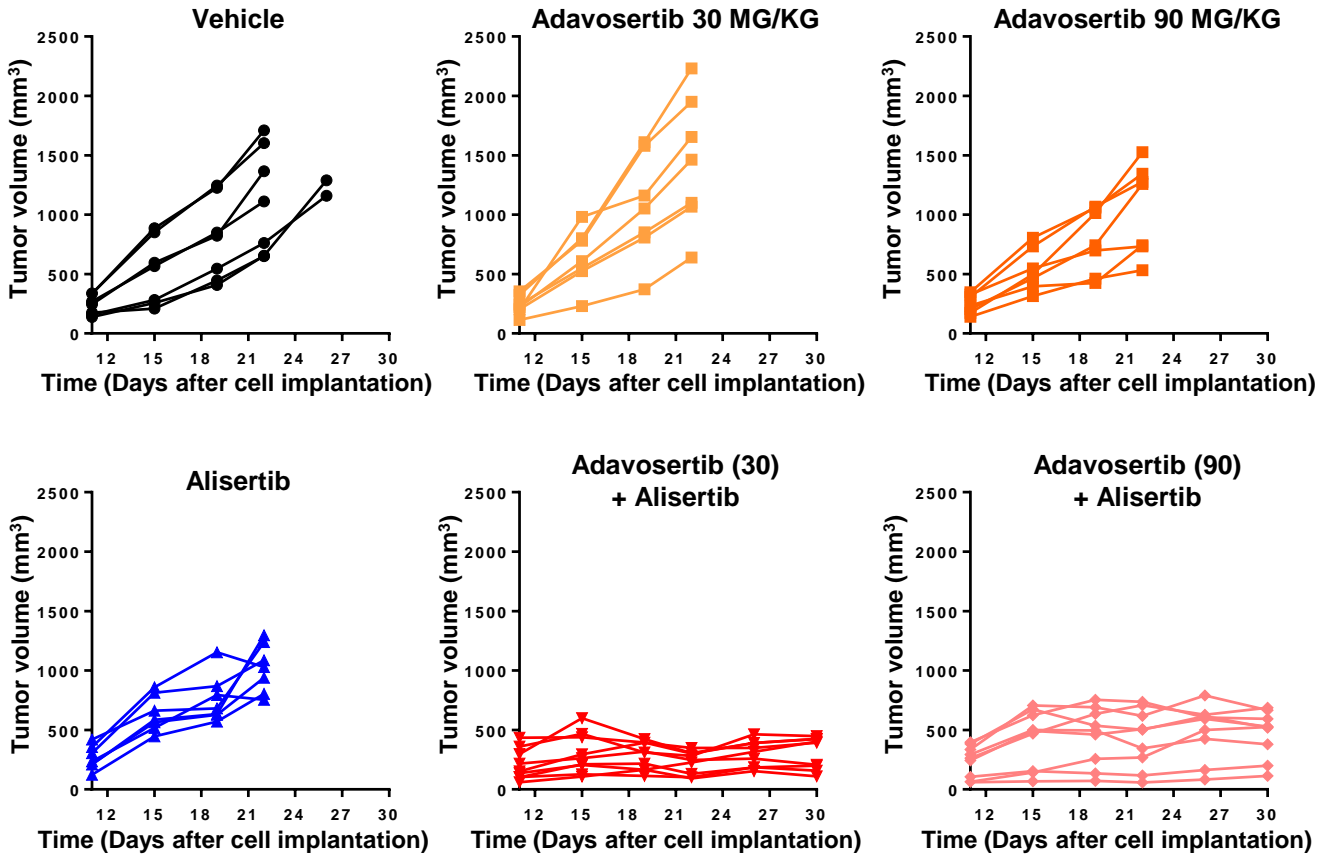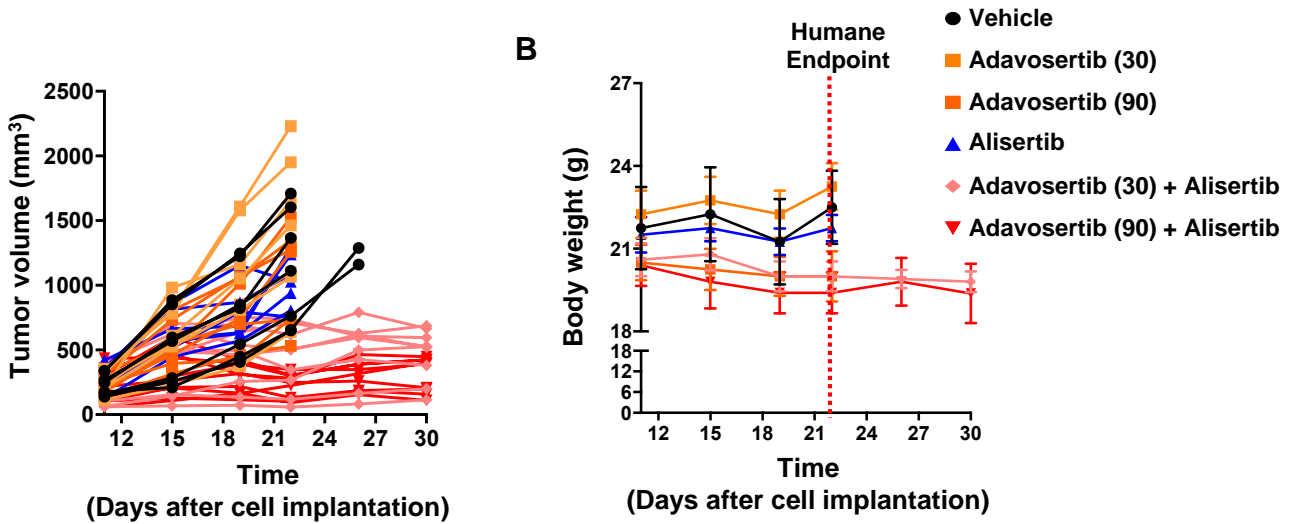

Supplement: NIHMS1025324-supplement-Supplementary_Fig_S3.pdf [file NIHMS1025324-supplement-Supplementary_Fig_S3.pdf]

**A**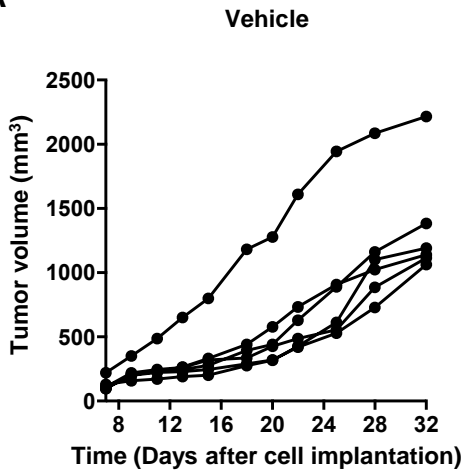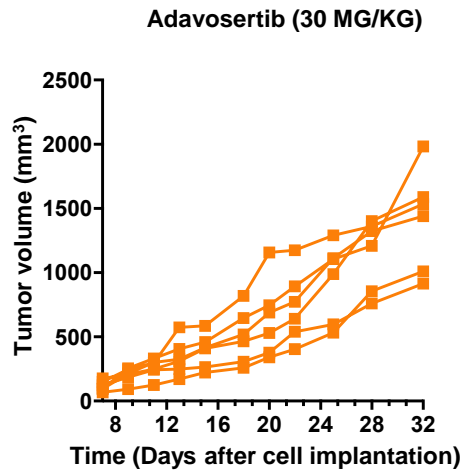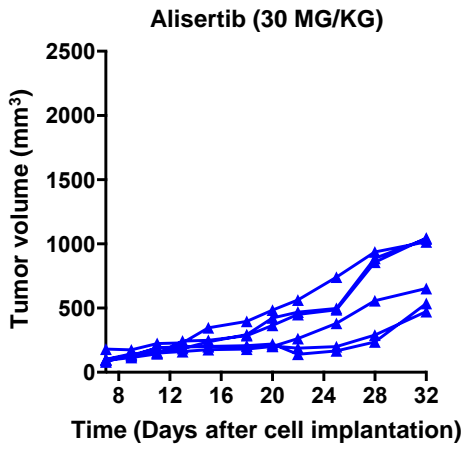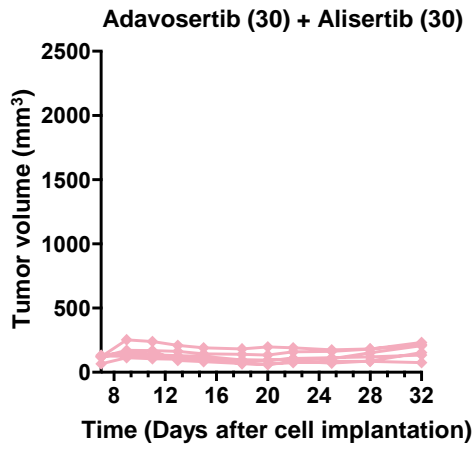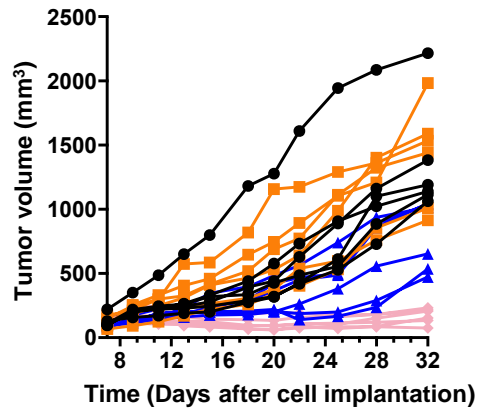**B**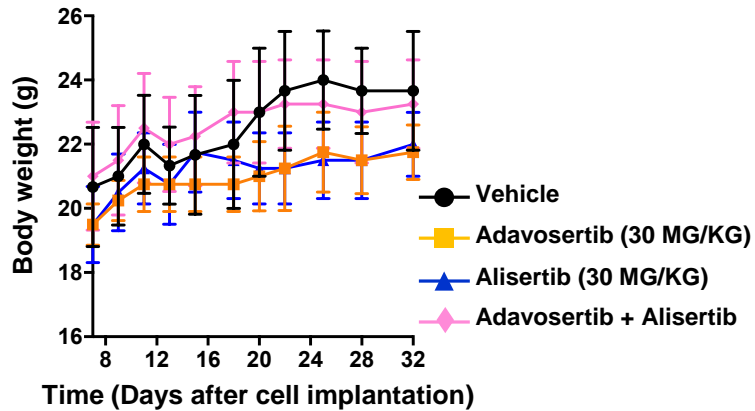

Supplement: NIHMS1025324-supplement-Supplementary_Fig_S4.pdf [file NIHMS1025324-supplement-Supplementary_Fig_S4.pdf]

**A**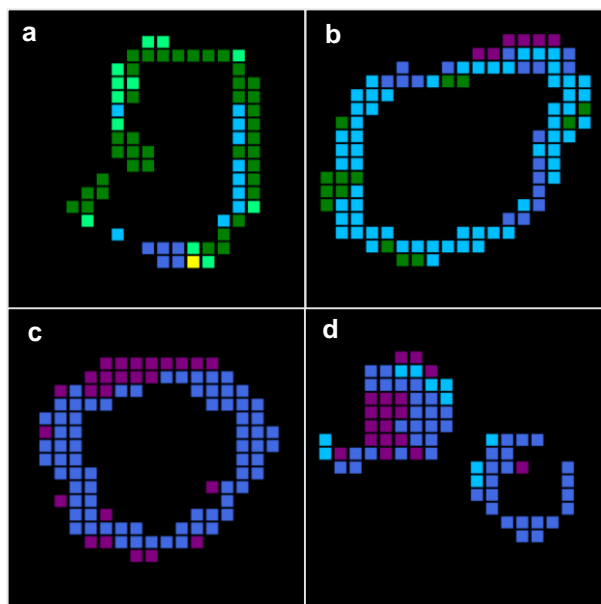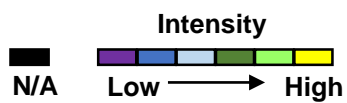**B**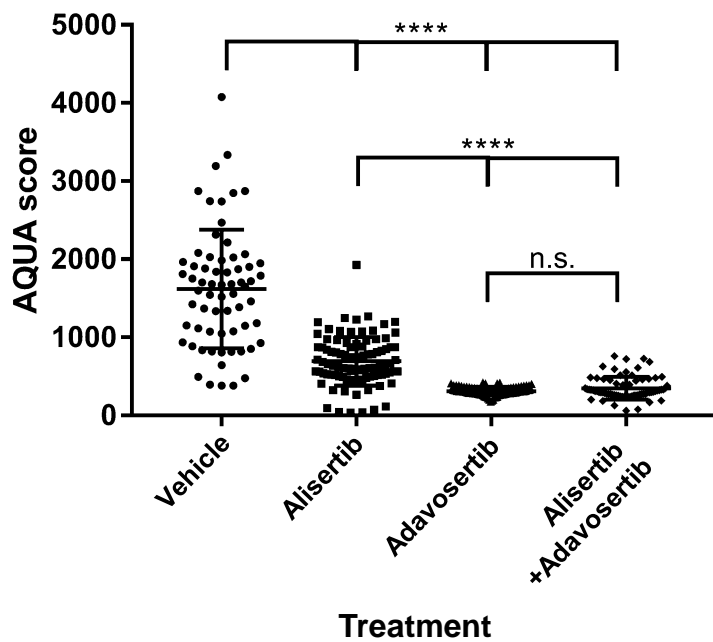

Supplement: NIHMS1025324-supplement-Supplementary_Fig_S5.pdf [file NIHMS1025324-supplement-Supplementary_Fig_S5.pdf]
